# Supplementary material
Source: HighWire-hosted journal article supplement (https://erj.ersjournals.com/content/55/6/2000718)
Supplement: inline-supplementary-material-1 [file inline-supplementary-material-1.pdf]

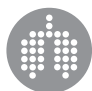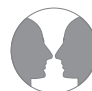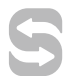

SHAREABLE PDF

# The looming threat of bedaquiline resistance in tuberculosis

Chen-Yuan Chiang<sup>1,2,3</sup>, Arnaud Trébucq<sup>4</sup>, Alberto Piubello<sup>5</sup>, Hans L. Rieder<sup>6,7</sup>, Valérie Schwoebel<sup>8</sup> and Armand Van Deun<sup>3,9</sup>

**Affiliations:** <sup>1</sup>Division of Pulmonary Medicine, Dept of Internal Medicine, Wan Fang Hospital, Taipei Medical University, Taipei, Taiwan. <sup>2</sup>Division of Pulmonary Medicine, Dept of Internal Medicine, School of Medicine, College of Medicine, Taipei Medical University, Taipei, Taiwan. <sup>3</sup>International Union Against Tuberculosis and Lung Disease, Paris, France. <sup>4</sup>Tuberculosis Consultant Services, Paris, France. <sup>5</sup>Damien Foundation, Niamey, Niger. <sup>6</sup>Epidemiology, Biostatistics, and Prevention Institute, University of Zurich, Switzerland. <sup>7</sup>Tuberculosis Consultant Services, Kirchlintach, Switzerland. <sup>8</sup>Toulouse, France. <sup>9</sup>Leuven, Belgium.

**Correspondence:** Chen-Yuan Chiang, 111 Hsin-Long Road, Section 3, Taipei, 116, Taiwan. E-mail: cychiang@theunion.org

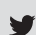

@ERSpublications

**The first step to reduce the risk of creating an epidemic of bedaquiline-resistant TB entails addressing the lack of access to rapid fluoroquinolone drug susceptibility testing in a high proportion of MDR-/RR-TB in low- and middle-income countries** <https://bit.ly/2KbtyZ3>

**Cite this article as:** Chiang C-Y, Trébucq A, Piubello A, *et al.* The looming threat of bedaquiline resistance in tuberculosis. *Eur Respir J* 2020; 55: 2000718 [<https://doi.org/10.1183/13993003.00718-2020>].

This single-page version can be shared freely online.

## To the Editor:

Multidrug- and rifampicin-resistant tuberculosis (MDR-/RR-TB) have evolved into a global public health crisis. In late 2019, the World Health Organization (WHO) issued a rapid communication [1] advising national TB programmes to phase out the injectable-containing shorter regimen. WHO indicated that the preferred treatment option is a shorter, all-oral, bedaquiline-containing regimen and emphasised that “access to rapid drug susceptibility testing, especially for ruling out fluoroquinolone resistance, is required” before starting the bedaquiline-containing shorter regimen [1].
